# Supplementary material for: Cobalt and manganese carboxylates for metal oxide thin film deposition by applying the atmospheric pressure combustion chemical vapour deposition process
Source: Royal Society of Chemistry journal article supplement (doi:10.1039/c8ra02288g), 2018-01-01
Supplement: c8ra02288g1.pdf [file c8ra02288g1.pdf]

# **Cobalt and Manganese Carboxylates for Metal Oxide Thin Film Deposition by Applying the Atmospheric Pressure Combustion Chemical Vapour Deposition Process**

B. S. M. Kretzschmar<sup>a</sup>, K. Assim<sup>b</sup>, A. Preuß<sup>b</sup>, A. Heft<sup>a</sup>, M. Korb<sup>b</sup>, M. Pügner<sup>c</sup>, T. Lampke<sup>c</sup>, B. Grünler<sup>a\*</sup>, H. Lang<sup>b\*</sup>

- a) Innovent e.V., Prüssingstraße 27B, 07745 Jena (Germany)
- b) Technische Universität Chemnitz, Faculty of Natural Sciences, Institute of Chemistry, Inorganic Chemistry, 09107 Chemnitz (Germany)
- c) Technische Universität Chemnitz, Faculty of Mechanical Engineering, Institute of Material Sciences and Engineering, Materials and Surface Engineering, 09107 Chemnitz (Germany)

*\*Corresponding authors:*

*Email: bg@innovent-jena.de; phone: +49(0)3641-2825-28; fax.: +49(0)3641-2825-30*

*Email: heinrich.lang@chemie.tu-chemnitz.de; phone: +49(0)371-531-21210; fax.: +49(0)371-531-21219.*

## **Content**

|                                               |   |
|-----------------------------------------------|---|
| Wire-firm model of complex <b>5</b> .....     | 2 |
| PXRD patterns of the TG residues.....         | 3 |
| XPS patterns of the deposited thin films..... | 4 |

### Wire-firm model of complex 5

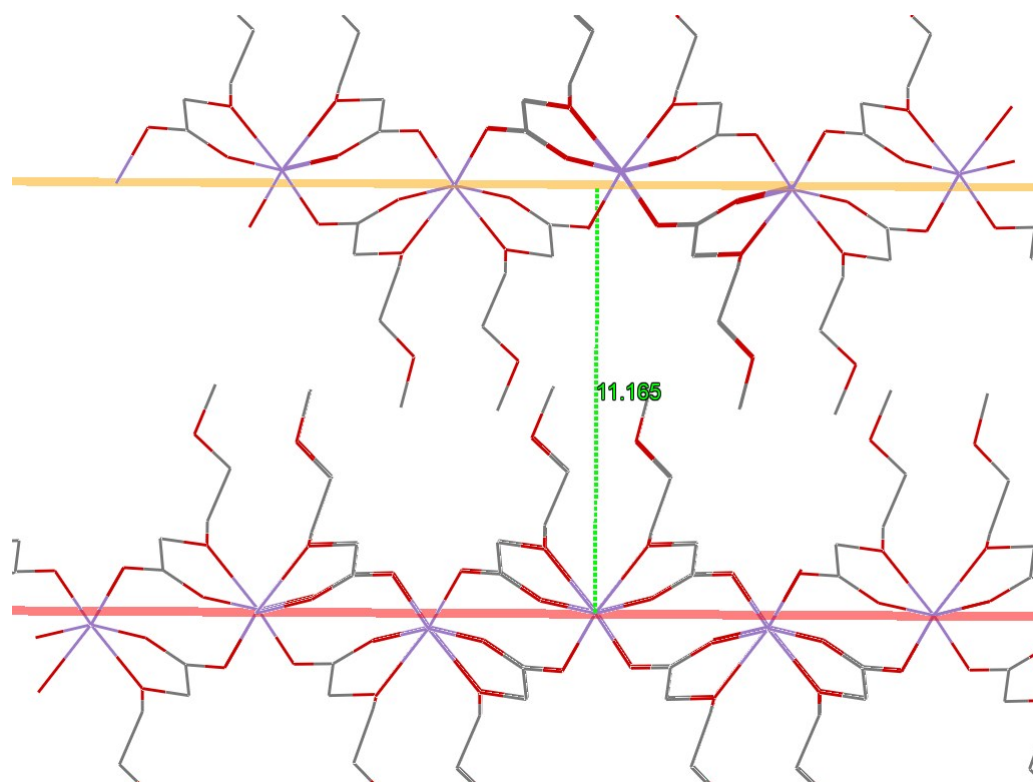

**Figure S11.** Wire-firm model of complex 5 showing the distance of 11.165 nm between manganese atoms of adjacent layers.

## PXRD patterns of the TG residues

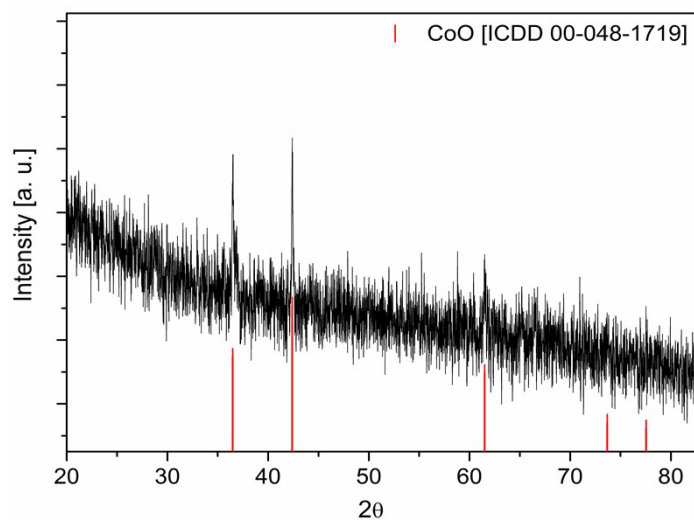

**Figure SI2.** PXRD of the residue obtained by the TG-MS study of **4** under argon (gas flow, 60 mL; heating rate, 5 K min<sup>-1</sup>).

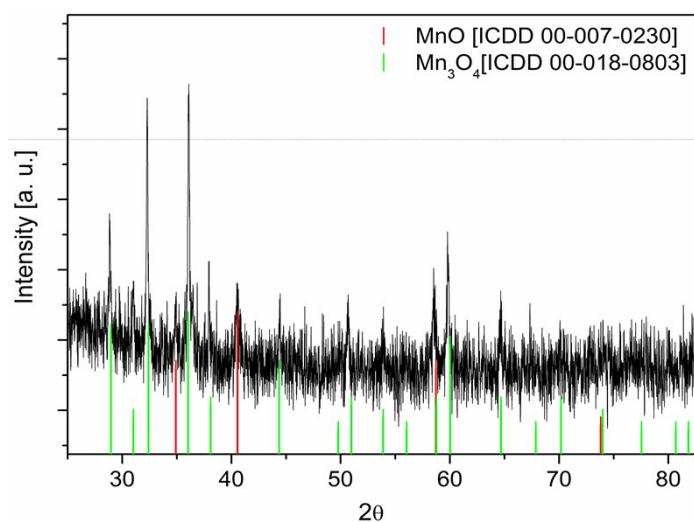

**Figure SI3.** PXRD of the residue obtained by the TG-MS study of **5** under argon (gas flow, 60 mL; heating rate, 2.5 K min<sup>-1</sup>).

## XPS patterns of the deposited thin films

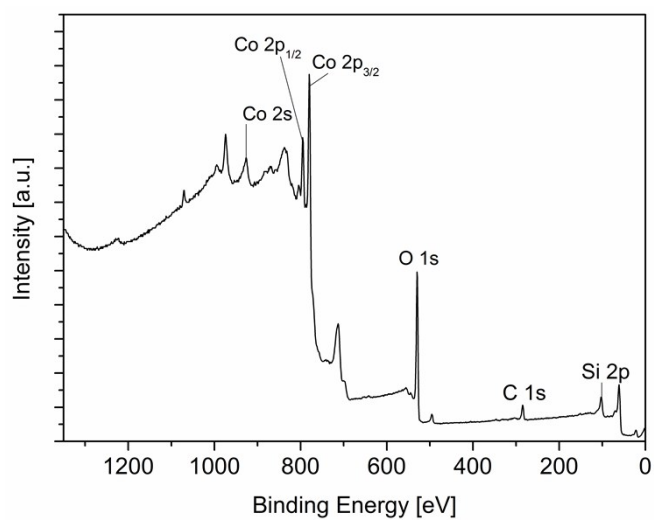

**Figure S14.** XPS survey spectra of the cobalt oxide thin layer deposited on a glass substrate using a 0.8 M precursor concentration of **4**.

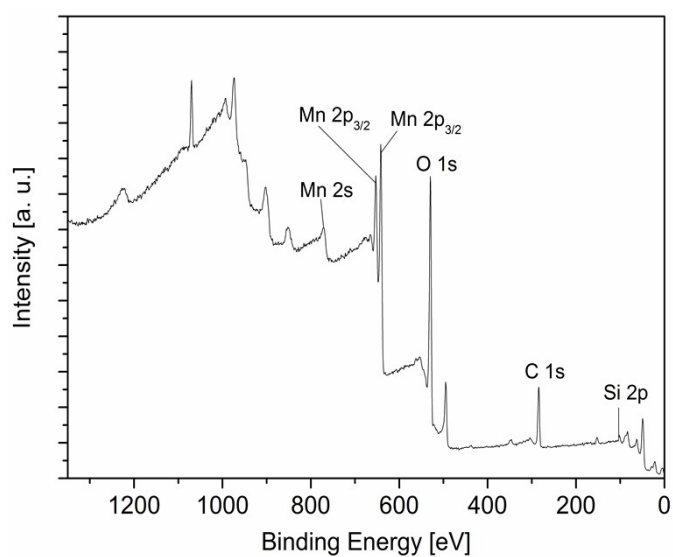

**Figure S15.** XPS survey spectra of the manganese oxide thin layer deposited on a glass substrate using a 0.8 M precursor concentration of **5**.
